# Supplementary material for: In2Si2S3X3 (X = S, Se, Te) Janus monolayers: from magnetic element-free spin-Hall transistor to sustainable energy generation
Source: Royal Society of Chemistry journal article supplement (doi:10.1039/d3tc03805j), 2024-01-01
Supplement: d3tc03805j1.pdf [file d3tc03805j1.pdf]

## Supplementary Information (SI)

### $\text{In}_2\text{Si}_2\text{S}_3\text{X}_3$ (X = S, Se, Te) Janus Monolayers: From Magnetic Element-Free Spin-Hall Transistor to Sustainable Energy Generation

Manish Kumar Mohanta\* and Puru Jena†

Department of Physics, Virginia Commonwealth University, Richmond, VA 23284, USA

E-mail: \*[manishkmr484@gmail.com](mailto:manishkmr484@gmail.com), [mohantamk@vcu.edu](mailto:mohantamk@vcu.edu), †[pjena@vcu.edu](mailto:pjena@vcu.edu)

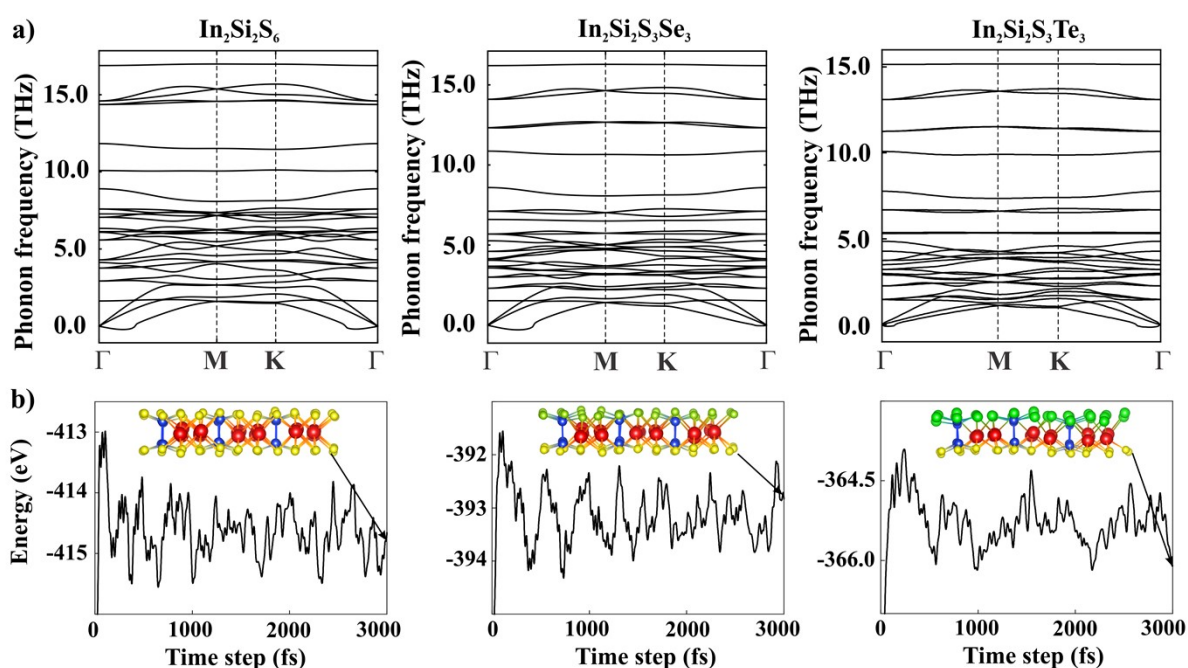

Figure S1 (a) Phonon dispersion spectra of monolayers and (b) snapshot of geometries after 3ps in ab initio molecular dynamics simulation (AIMD) at 300 K.

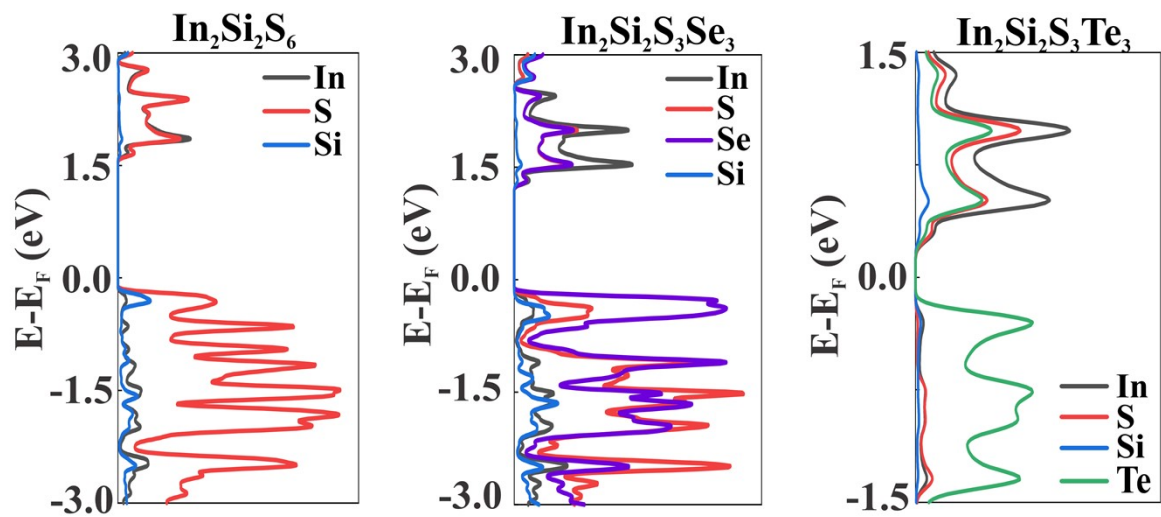

Figure S2 Projected density of states (PDOS) of monolayers near Fermi energy (set to zero).

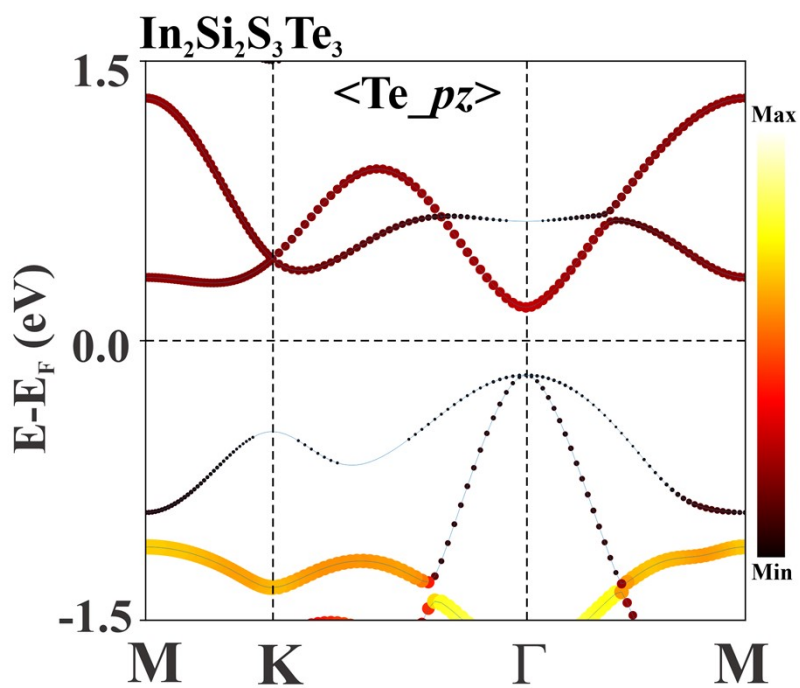

Figure S3: Te<sub>p<sub>z</sub></sub> orbital projected band structure of Janus In<sub>2</sub>Si<sub>2</sub>S<sub>3</sub>Te<sub>3</sub> monolayer.

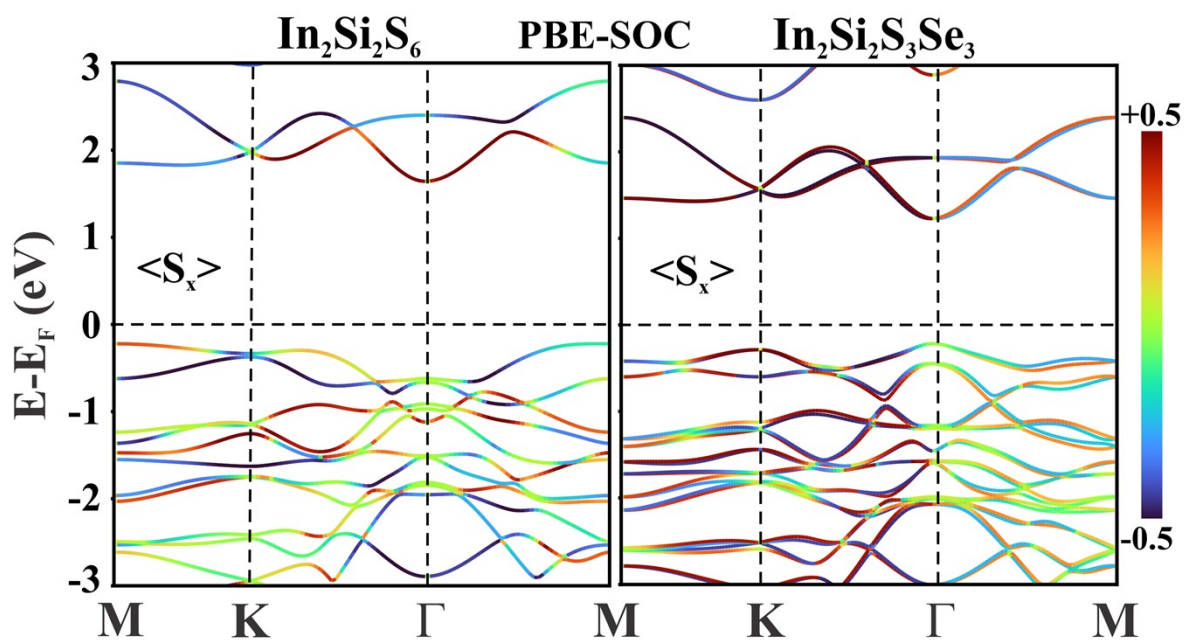

Figure S4: In-plane spin projected band structure of pristine  $\text{In}_2\text{Si}_2\text{S}_6$  and  $\text{In}_2\text{Si}_2\text{S}_3\text{Se}_3$  monolayer.

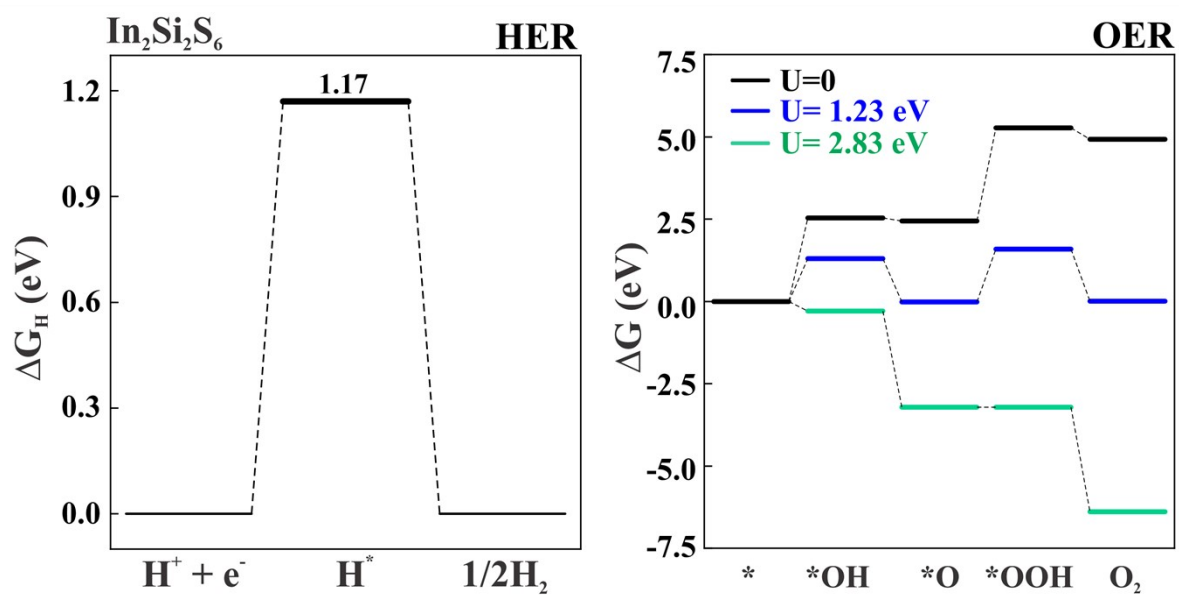

Figure S5: Gibbs free energy profile for HER and OER of pristine  $\text{In}_2\text{Si}_2\text{S}_6$  monolayer

| Monolayers                                    | $C_{11}$ (N/m) | $C_{12}$ (N/m) | Young's modulus $Y$ (N/m) |
|-----------------------------------------------|----------------|----------------|---------------------------|
| $\text{In}_2\text{Si}_2\text{S}_6$            | 73.067         | 22.630         | 66.059                    |
| $\text{In}_2\text{Si}_2\text{S}_3\text{Se}_3$ | 67.916         | 21.041         | 61.397                    |
| $\text{In}_2\text{Si}_2\text{S}_3\text{Te}_3$ | 58.283         | 20.324         | 51.196                    |
| * $\text{CuInP}_2\text{S}_6$                  | 62.141         | 18.077         | 56.882                    |
| *Experimentally synthesized <sup>1-3</sup>    |                |                |                           |

### Thermodynamics for oxygen evolution reaction:

The mechanism of OER is assumed to proceed through -OH, -O and -OOH intermediates. The Gibbs free energy of each elementary step is as follows:<sup>4</sup>

$$\Delta G_O = E_{slab, O} - E_{slab} - (E_{H_2O} - E_{H_2})$$

$$\Delta G_{OH} = E_{slab, OH} - E_{slab} - (E_{H_2O} - \frac{1}{2}E_{H_2})$$

$$\Delta G_{OOH} = E_{slab, OOH} - E_{slab} - (2E_{H_2O} - \frac{3}{2}E_{H_2})$$

|     | $\Delta G$                                                          | $\eta$                                                                          |
|-----|---------------------------------------------------------------------|---------------------------------------------------------------------------------|
| HER | $\Delta G_H = E_{*H} - E_* - \frac{1}{2}E_{H_2}$                    | $\eta^{HER} = -\frac{ \Delta G_{H^*} }{e}$                                      |
| OER | $\Delta G_1 = \Delta G_{OH}$                                        | $\eta^{OER} = \frac{\max\{\Delta G_1, \Delta G_2, \Delta G_3, \Delta G_4\}}{e}$ |
|     | $\Delta G_2 = \Delta G_O - \Delta G_{OH}$                           |                                                                                 |
|     | $\Delta G_3 = \Delta G_{OOH} - \Delta G_O$                          |                                                                                 |
|     | $\Delta G_4 = 4.92\text{eV} - \Delta G_1 - \Delta G_2 - \Delta G_3$ |                                                                                 |

| Adsorbates           | $E_{DFT}$ (eV) | $\Delta G$ (eV)       |
|----------------------|----------------|-----------------------|
| $\text{H}_2$         | -6.77          | $\Delta G_1 = 2.53$   |
| $\text{H}_2\text{O}$ | -14.22         | $\Delta G_2 = -0.086$ |
| *                    | -190.8004      | $\Delta G_3 = 2.83$   |
| *OH                  | -199.104       | $\Delta G_4 = -0.35$  |
| *O                   | -195.807       | $\Delta G_H = 1.17$   |
| *OOH                 | -203.81        |                       |

|    |           |  |
|----|-----------|--|
| *H | -193.0159 |  |
|----|-----------|--|

Table S4 Calculated DFT total energy  $E_{\text{DFT}}$  for gases and adsorbates in the HER and OER process for Janus  $\text{In}_2\text{Si}_2\text{S}_3\text{Se}_3$  monolayer

| Adsorbates           | $E_{\text{DFT}}$ (eV) | $\Delta G$ (eV)      |
|----------------------|-----------------------|----------------------|
| <b>Se-side</b>       |                       |                      |
| $\text{H}_2$         | -6.77                 | $\Delta G_1 = 2.37$  |
| $\text{H}_2\text{O}$ | -14.22                | $\Delta G_2 = 0.673$ |
| *                    | -181.72               | $\Delta G_3 = 2.25$  |
| *O                   | -186.12               | $\Delta G_4 = -0.37$ |
| *OH                  | -190.18               | $\Delta G_H = 1.29$  |
| *OOH                 | -194.69               |                      |
| *H                   | -183.82               |                      |
| <b>S-side</b>        |                       |                      |
| *                    | -181.72               | $\Delta G_1 = 2.42$  |
| *O                   | -186.76               | $\Delta G_2 = -0.01$ |
| *OH                  | -190.13               | $\Delta G_3 = 2.95$  |
| *OOH                 | -194.65               | $\Delta G_4 = -0.44$ |
| *H                   | -183.97               | $\Delta G_H = 1.14$  |

References:

- 1 X. Jiang, X. Wang, X. Wang, X. Zhang, R. Niu, J. Deng, S. Xu, Y. Lun, Y. Liu, T. Xia, J. Lu and J. Hong, *Nature Communications*, 2022, **13**, 574.
- 2 J. Yao, Y. Liu, S. Ding, Y. Zhu, Z. Mao, S. V. Kalinin and Y. Liu, *arXiv preprint arXiv:2309.10045*.
- 3 F. Liu, L. You, K. L. Seyler, X. Li, P. Yu, J. Lin, X. Wang, J. Zhou, H. Wang, H. He, S. T. Pantelides, W. Zhou, P. Sharma, X. Xu, P. M. Ajayan, J. Wang and Z. Liu, *Nature Communications*, 2016, **7**, 12357.
- 4 Z. Xu, J. Rossmeisl and J. R. Kitchin, *J. Phys. Chem. C*, 2015, **119**, 4827–4833.
